# Supplementary material
Source: ML conference proceedings conference paper supplement (https://openaccess.thecvf.com/content/ICCV_2019/html/Huang_Attention_on_Attention_ICCV_2019_paper.html)
Supplement: Supplementary file 1 [file Huang_Attention_on_Attention_ICCV_2019_supplemental.pdf]

| Image                                                                               | Generated captions                                                                                                                                                                                                                                                                                                                                                                                                                                                                                                                                                                                                                                                                                                                                                                                   | Ground truths                                                                                                                                                                                                                                                                                                                                          |
|-------------------------------------------------------------------------------------|------------------------------------------------------------------------------------------------------------------------------------------------------------------------------------------------------------------------------------------------------------------------------------------------------------------------------------------------------------------------------------------------------------------------------------------------------------------------------------------------------------------------------------------------------------------------------------------------------------------------------------------------------------------------------------------------------------------------------------------------------------------------------------------------------|--------------------------------------------------------------------------------------------------------------------------------------------------------------------------------------------------------------------------------------------------------------------------------------------------------------------------------------------------------|
|    | <p><b>Base model:</b> A wooden bench sitting on top of a wooden bench.</p> <p><b>Encoder (w/ refining, w/o AoA):</b> A box of books sitting on top of a wooden bench.</p> <p><b>Encoder (w/ refining, w/ AoA):</b> A book sitting on top of a wooden bench.</p> <p><b>LSTM decoder (H=1):</b> A wooden bench sitting next to a wooden bench.</p> <p><b>AoA decoder (H=1):</b> A wooden bench sitting on top of a wooden bench.</p> <p><b>Base decoder (H=8):</b> A row of books sitting on a wooden bench.</p> <p><b>LSTM decoder (H=8):</b> A wooden bench sitting on the side of a wooden bench.</p> <p><b>AoA decoder (H=8):</b> A row of benches sitting on a wooden bench.</p> <p><b>Full (AoANet):</b> A <b>book</b> sitting on top of a wooden bench.</p>                                     | <p>GT1: A book on a wooden bench on a street.</p> <p>GT2: A book rest on one of the benches.</p> <p>GT3: A california travel guide book on a park bench.</p> <p>GT4: A big entitled california is on the bench.</p> <p>GT5: A book sitting on top of a wooden desk.</p>                                                                                |
|    | <p><b>Base model:</b> A mountain with a mountain in the background.</p> <p><b>Encoder (w/ refining, w/o AoA):</b> A view of a mountain with a mountain in the background.</p> <p><b>Encoder (w/ refining, w/ AoA):</b> A black and white photo of a mountain.</p> <p><b>LSTM decoder (H=1):</b> A mountain in the background with a mountain.</p> <p><b>AoA decoder (H=1):</b> A black and white photo of a mountain on a mountain.</p> <p><b>Base decoder (H=8):</b> A view of a mountain with a mountain.</p> <p><b>LSTM decoder (H=8):</b> A mountain with a mountain in the background.</p> <p><b>AoA decoder (H=8):</b> A view of a mountain with a mountain in the background.</p> <p><b>Full (AoANet):</b> A black and white photo of a mountain <b>covered with snow</b>.</p>                | <p>GT1: A black and white picture of hills or mountains.</p> <p>GT2: A black and white photo of mountains and the sky.</p> <p>GT3: A black and white photograph of mountains with snow.</p> <p>GT4: A black and white picture of the top view of a snow capped mountain somewhere.</p> <p>GT5: A large mountain range partially covered with snow.</p> |
|   | <p><b>Base model:</b> A brown bear eating a piece of food.</p> <p><b>Encoder (w/ refining, w/o AoA):</b> A brown bear eating a piece of food.</p> <p><b>Encoder (w/ refining, w/ AoA):</b> A monkey eating a doughnut in a rock.</p> <p><b>LSTM decoder (H=1):</b> A brown bear sitting on top of a rock eating a piece of food.</p> <p><b>AoA decoder (H=1):</b> A brown bear sitting on top of a rock eating a snack.</p> <p><b>Base decoder (H=8):</b> A brown bear eating a banana in its mouth.</p> <p><b>LSTM decoder (H=8):</b> A brown bear eating a piece of food.</p> <p><b>AoA decoder (H=8):</b> A brown bear eating a piece of food on a rock.</p> <p><b>Full (AoANet):</b> A monkey <b>sitting on rocks</b> eating a piece of food.</p>                                                | <p>GT1: Small monkey eating fruit sitting on a rock.</p> <p>GT2: A small monkey sitting and eating in its habitat.</p> <p>GT3: A little monkey sitting next to a rock eating a piece of fruit.</p> <p>GT4: A monkey is eating while sitting on a rock.</p> <p>GT5: A monkey sits downs while eating some food.</p>                                     |
|  | <p><b>Base model:</b> A vase with purple flowers sitting on a table.</p> <p><b>Encoder (w/ refining, w/o AoA):</b> A vase with flowers sitting on top of a table.</p> <p><b>Encoder (w/ refining, w/ AoA):</b> A white vase with purple flowers sitting on a table.</p> <p><b>LSTM decoder (H=1):</b> A vase with flowers sitting on top of a table.</p> <p><b>AoA decoder (H=1):</b> A vase filled with purple flowers sitting on a table.</p> <p><b>Base decoder (H=8):</b> A white vase with purple flowers sitting on a table.</p> <p><b>LSTM decoder (H=8):</b> A vase with flowers sitting on a table.</p> <p><b>AoA decoder (H=8):</b> A white vase filled with purple flowers on a table.</p> <p><b>Full (AoANet):</b> A <b>white</b> vase filled with <b>purple</b> flowers on a table.</p> | <p>GT1: A vase of light and dark purple flowers in a white vase.</p> <p>GT2: A close up of a vase with many flowers.</p> <p>GT3: A bouquet of fresh flowers in a cream colored vase.</p> <p>GT4: A small white vase of purple flowers on a table.</p> <p>GT5: A white vase filled with purple flowers on top of a table.</p>                           |
|  | <p><b>Base model:</b> A cat laying on top of a bed.</p> <p><b>Encoder (w/ refining, w/o AoA):</b> A black and white cat laying on a bed.</p> <p><b>Encoder (w/ refining, w/ AoA):</b> A cat laying on top of a blanket.</p> <p><b>LSTM decoder (H=1):</b> A cat laying on top of a bed.</p> <p><b>AoA decoder (H=1):</b> A cat laying on top of a blanket.</p> <p><b>Base decoder (H=8):</b> A cat laying on top of a bed.</p> <p><b>LSTM decoder (H=8):</b> A cat laying on top of a bed.</p> <p><b>AoA decoder (H=8):</b> A cat laying on top of a blanket.</p> <p><b>Full (AoANet):</b> A cat laying on a bed <b>with a blanket</b>.</p>                                                                                                                                                          | <p>GT1: A cat under a blanket looking at something.</p> <p>GT2: A small cat peeking its head from under a blanket.</p> <p>GT3: A cute kitten peeking out from under a quilt.</p> <p>GT4: A gray tiger cat sleeping on a bed under a blanket.</p> <p>GT5: A cat is peeping out from under a blanket.</p>                                                |
|  | <p><b>Base model:</b> A traffic light on the side of a street.</p> <p><b>Encoder (w/ refining, w/o AoA):</b> A traffic light on the side of a street.</p> <p><b>Encoder (w/ refining, w/ AoA):</b> A group of traffic lights on a city street.</p> <p><b>LSTM decoder (H=1):</b> A traffic light on a city street with a building.</p> <p><b>AoA decoder (H=1):</b> A traffic lights on a city street with buildings.</p> <p><b>Base decoder (H=8):</b> A traffic light on the side of a city street.</p> <p><b>LSTM decoder (H=8):</b> A traffic light on the side of a street.</p> <p><b>AoA decoder (H=8):</b> A traffic light on a city street with a city.</p> <p><b>Full (AoANet):</b> A <b>street</b> with <b>traffic lights</b> and <b>buildings</b> in the background.</p>                  | <p>GT1: A couple of traffic lights hanging over a city street.</p> <p>GT2: Traffic lights shine over an empty intersection at twilight.</p> <p>GT3: A street with traffic lights, wall and buildings.</p> <p>GT4: The electronic traffic signals are lit up during dawn.</p> <p>GT5: Empty city intersection in the early morning hours.</p>           |
|  | <p><b>Base model:</b> A brown horse standing in the water next to a lake.</p> <p><b>Encoder (w/ refining, w/o AoA):</b> Two horses are standing in the water.</p> <p><b>Encoder (w/ refining, w/ AoA):</b> Two horses are standing in the water.</p> <p><b>LSTM decoder (H=1):</b> A horse standing in the water in a field.</p> <p><b>AoA decoder (H=1):</b> A horse standing in the water near a river.</p> <p><b>Base decoder (H=8):</b> A brown horse standing in the water.</p> <p><b>LSTM decoder (H=8):</b> A horse standing in the water in a field.</p> <p><b>AoA decoder (H=8):</b> A horse standing in the water next to a river.</p> <p><b>Full (AoANet):</b> <b>Two</b> horses walking in the water in a field.</p>                                                                     | <p>GT1: A couple of horses standing in a river next to an island.</p> <p>GT2: Two horses standing in a stream next to a wooded area.</p> <p>GT3: Two horses are walking through a river together.</p> <p>GT4: Horses standing in shallow water in a wooded area.</p> <p>GT5: Two horses that are standing in some water.</p>                           |

Figure 1: Captions generated by the ablated models and AoANet, as well as the corresponding ground truths.

| Image                                                                               | Generated captions                                                                                                                                                                                                                                                                                                                                                                                                                                                                                                                                                                                                                                                                                                                                                                                                                       | Ground truths                                                                                                                                                                                                                                                                                                                                                                         |
|-------------------------------------------------------------------------------------|------------------------------------------------------------------------------------------------------------------------------------------------------------------------------------------------------------------------------------------------------------------------------------------------------------------------------------------------------------------------------------------------------------------------------------------------------------------------------------------------------------------------------------------------------------------------------------------------------------------------------------------------------------------------------------------------------------------------------------------------------------------------------------------------------------------------------------------|---------------------------------------------------------------------------------------------------------------------------------------------------------------------------------------------------------------------------------------------------------------------------------------------------------------------------------------------------------------------------------------|
|    | <p><b>Base model:</b> A man standing in front of a car with a UNK.</p> <p><b>Encoder (w/ refining, w/o AoA):</b> A man wearing a hat standing next to a beach with a frisbee.</p> <p><b>Encoder (w/ refining, w/ AoA):</b> A man standing in a parking lot with a frisbee.</p> <p><b>LSTM decoder (H=1):</b> A man is standing next to a car on a water.</p> <p><b>AoA decoder (H=1):</b> A man is standing on a car with a frisbee.</p> <p><b>Base decoder (H=8):</b> A man standing in a parking lot with a frisbee.</p> <p><b>LSTM decoder (H=8):</b> A man sitting on a parking lot with a boat.</p> <p><b>AoA decoder (H=8):</b> A man standing in a parking lot with a frisbee.</p> <p><b>Full (AoANet):</b> A man wearing a <b>hat</b> holding a <b>frisbee</b> in a <b>parking lot</b>.</p>                                      | <p>GT1: A man in holds a frisbee in the parking lot by the river.</p> <p>GT2: The man found the frisbee by the parked cars.</p> <p>GT3: A man holding a frisbee in a parking lot near water.</p> <p>GT4: A man holding a white object in his hand.</p> <p>GT5: A man wearing a hat and holding an object in his hand.</p>                                                             |
|    | <p><b>Base model:</b> A pool with a pool with people and umbrellas.</p> <p><b>Encoder (w/ refining, w/o AoA):</b> A group of people standing in a park with umbrellas.</p> <p><b>Encoder (w/ refining, w/ AoA):</b> A group of people standing in a pool with umbrellas.</p> <p><b>LSTM decoder (H=1):</b> A pool with a pool with a pool with a pool.</p> <p><b>AoA decoder (H=1):</b> A swimming pool with a pool with people.</p> <p><b>Base decoder (H=8):</b> A pool with a pool with umbrellas on a pool.</p> <p><b>LSTM decoder (H=8):</b> A swimming pool with a bunch of chairs and a table.</p> <p><b>AoA decoder (H=8):</b> A swimming pool with tables and chairs with umbrellas.</p> <p><b>Full (AoANet):</b> A swimming pool with <b>umbrellas</b> and <b>people</b> standing.</p>                                         | <p>GT1: The clear pool stood empty as people stood around nearby.</p> <p>GT2: Some people walking around a swimming pool and trees.</p> <p>GT3: Large swimming pool with tents near the trees.</p> <p>GT4: A large in ground swimming pool near tents.</p> <p>GT5: A pool with several visitors sitting beside it.</p>                                                                |
|   | <p><b>Base model:</b> A group of people walking down a street with skateboards.</p> <p><b>Encoder (w/ refining, w/o AoA):</b> A man and a child riding on a skateboard.</p> <p><b>Encoder (w/ refining, w/ AoA):</b> A man and a little girl on a skateboard.</p> <p><b>LSTM decoder (H=1):</b> A group of people riding skateboards down a street.</p> <p><b>AoA decoder (H=1):</b> A man and a child on a skateboard in the street.</p> <p><b>Base decoder (H=8):</b> A group of people riding skateboards down a street.</p> <p><b>LSTM decoder (H=8):</b> A man and a woman riding a skateboard down a street.</p> <p><b>AoA decoder (H=8):</b> A man and a child on a skateboard.</p> <p><b>Full (AoANet):</b> A man and a <b>child sitting on a skateboard</b>.</p>                                                                | <p>GT1: A girl hitching a ride with her dad on a skateboard.</p> <p>GT2: A man riding a skateboard has a child between his legs.</p> <p>GT3: A girl sits between a mans legs on a skateboard.</p> <p>GT4: A man riding a skateboard next to a woman.</p> <p>GT5: The skateboarder has a passenger on his skateboard.</p>                                                              |
|  | <p><b>Base model:</b> A man and a woman standing in a kitchen preparing food.</p> <p><b>Encoder (w/ refining, w/o AoA):</b> A group of people standing in a kitchen.</p> <p><b>Encoder (w/ refining, w/ AoA):</b> A group of people standing in a kitchen preparing food.</p> <p><b>LSTM decoder (H=1):</b> A man and a woman standing in a kitchen.</p> <p><b>AoA decoder (H=1):</b> A group of people standing in a kitchen.</p> <p><b>Base decoder (H=8):</b> A man and a woman standing in a kitchen.</p> <p><b>LSTM decoder (H=8):</b> A man and a woman standing in a kitchen.</p> <p><b>AoA decoder (H=8):</b> A man and a woman standing in a kitchen preparing food.</p> <p><b>Full (AoANet):</b> A <b>group of people</b> standing in a kitchen preparing food.</p>                                                            | <p>GT1: A picture of an older man cutting a turkey on the counter.</p> <p>GT2: A group of people that are standing in the kitchen.</p> <p>GT3: A group of people standing over some food.</p> <p>GT4: Three people agree in the kitchen near a cluttered bar.</p> <p>GT5: A number of people in a kitchen preparing food.</p>                                                         |
|  | <p><b>Base model:</b> A picture of a garden with a plant in a window.</p> <p><b>Encoder (w/ refining, w/o AoA):</b> A bunch of apples in a window with a window.</p> <p><b>Encoder (w/ refining, w/ AoA):</b> A garden with a bunch of apples and a window.</p> <p><b>LSTM decoder (H=1):</b> A picture of a bunch of plants in a house.</p> <p><b>AoA decoder (H=1):</b> A collage of pictures of a house with a tree.</p> <p><b>Base decoder (H=8):</b> A group of plants in a window with a table.</p> <p><b>LSTM decoder (H=8):</b> A picture of a tree with a bunch of apples.</p> <p><b>AoA decoder (H=8):</b> A collage of pictures of a garden with a tree.</p> <p><b>Full (AoANet):</b> A <b>collage</b> of pictures of a house with a flower.</p>                                                                              | <p>GT1: Multiple images are seen showing forest scenes and a small cottage.</p> <p>GT2: A collection of different plants and fields, with a tomato plant being the most prominent.</p> <p>GT3: Various types of pictures that are of different plants.</p> <p>GT4: Colorful collection of pictures of a wooded area.</p> <p>GT5: A collage of several photos show outdoor scenes.</p> |
|  | <p><b>Base model:</b> A man hitting a tennis ball with a tennis racket.</p> <p><b>Encoder (w/ refining, w/o AoA):</b> A group of people playing tennis on a tennis court.</p> <p><b>Encoder (w/ refining, w/ AoA):</b> A group of people playing tennis on a tennis court.</p> <p><b>LSTM decoder (H=1):</b> A group of people playing tennis on a tennis court.</p> <p><b>AoA decoder (H=1):</b> A couple of women standing on a tennis court with tennis balls.</p> <p><b>Base decoder (H=8):</b> A couple of people holding tennis rackets at a tennis ball.</p> <p><b>LSTM decoder (H=8):</b> A woman hitting a tennis ball with a tennis racket.</p> <p><b>AoA decoder (H=8):</b> Two women playing tennis on a tennis court.</p> <p><b>Full (AoANet):</b> <b>Two</b> people standing on a tennis court holding tennis rackets.</p> | <p>GT1: Two young sexy women holding tennis racquets and tennis balls.</p> <p>GT2: A pair of young women hold tennis balls and rackets.</p> <p>GT3: Two women on a tennis court with tennis rackets and balls.</p> <p>GT4: Two female tennis players standing with their rackets.</p> <p>GT5: Two women with tennis rackets and balls are standing.</p>                               |

Figure 2: More examples.
